# Supplementary material
Source: Research Square preprint supplement (doi:10.21203/rs.3.rs-8938716/v1)

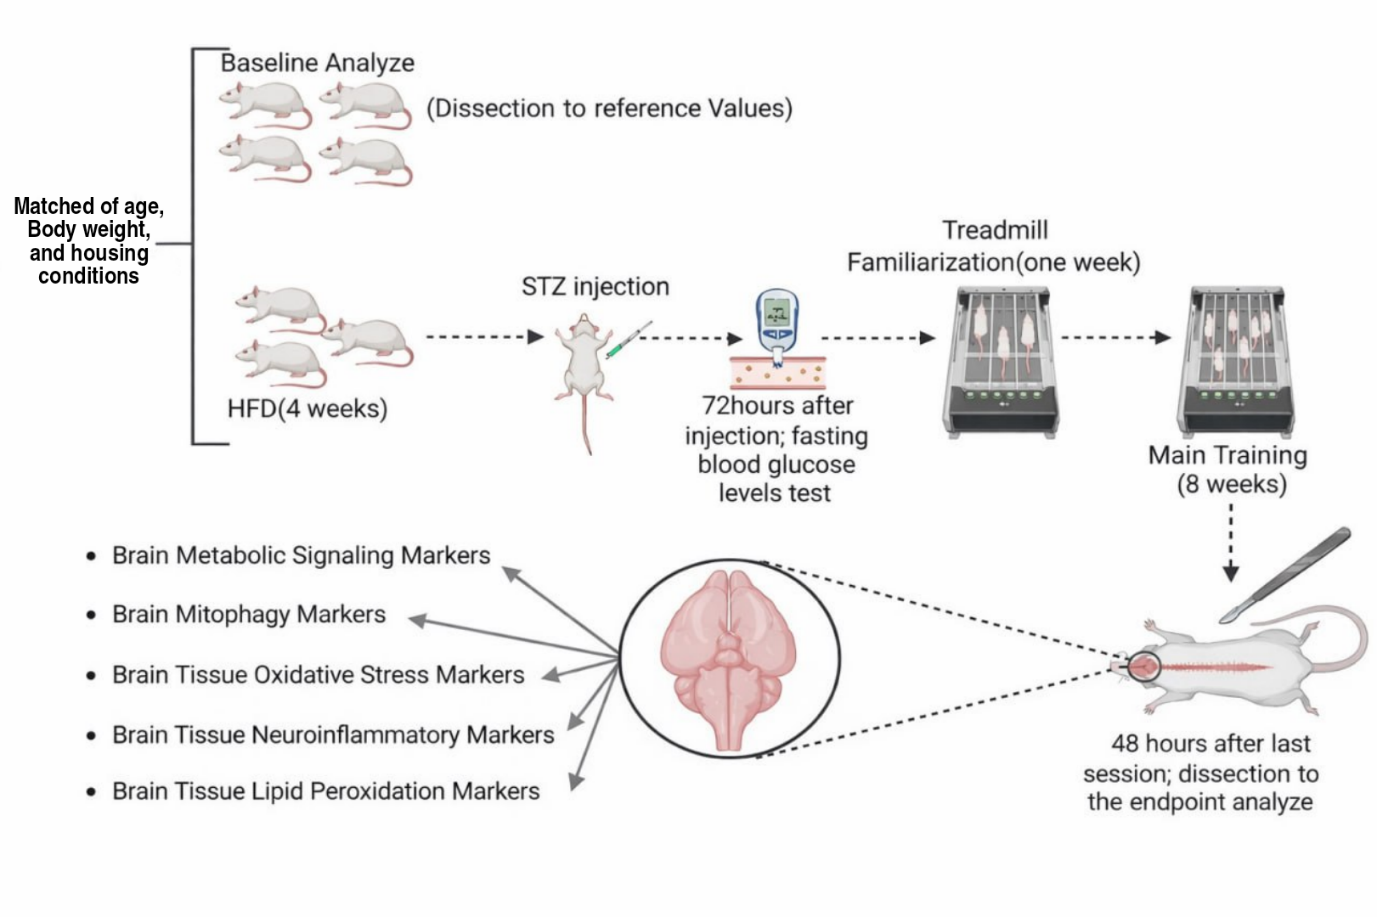


Figure1.Schematic representation of the experimental design

Supplement: Supplementary file 1 [file da82199723d4742eadcb7000.docx]
